# Supplementary material
Source: publisher figshare collection journal article supplement (https://plos.figshare.com/articles/dataset/_/818752)
Supplement: Supplementary file 1 [file 1 › Figure_S2.pdf]

**A****Figure S2****CHP2**

NC 9

NC 13

patient

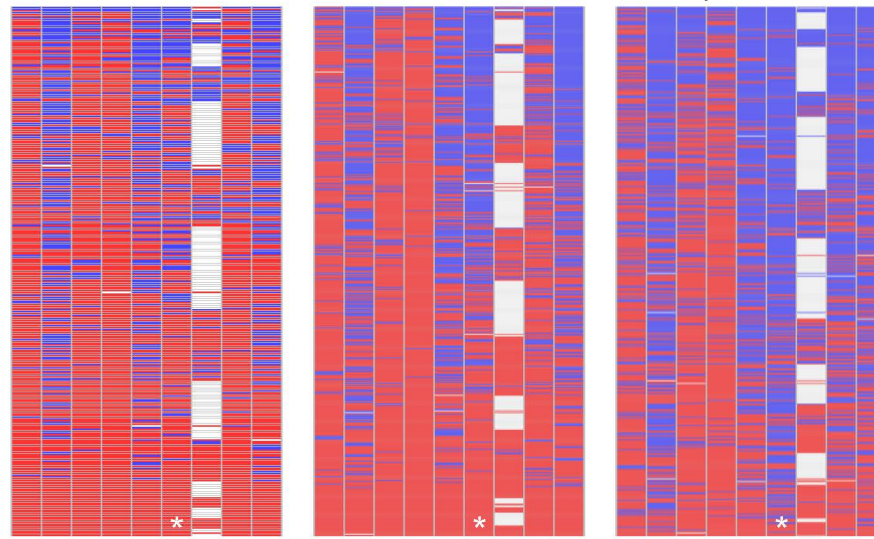

Methylation [%]  
# of reads

73.0  
301

69.4  
579

49.9  
567

NC 9

NC 13

patient

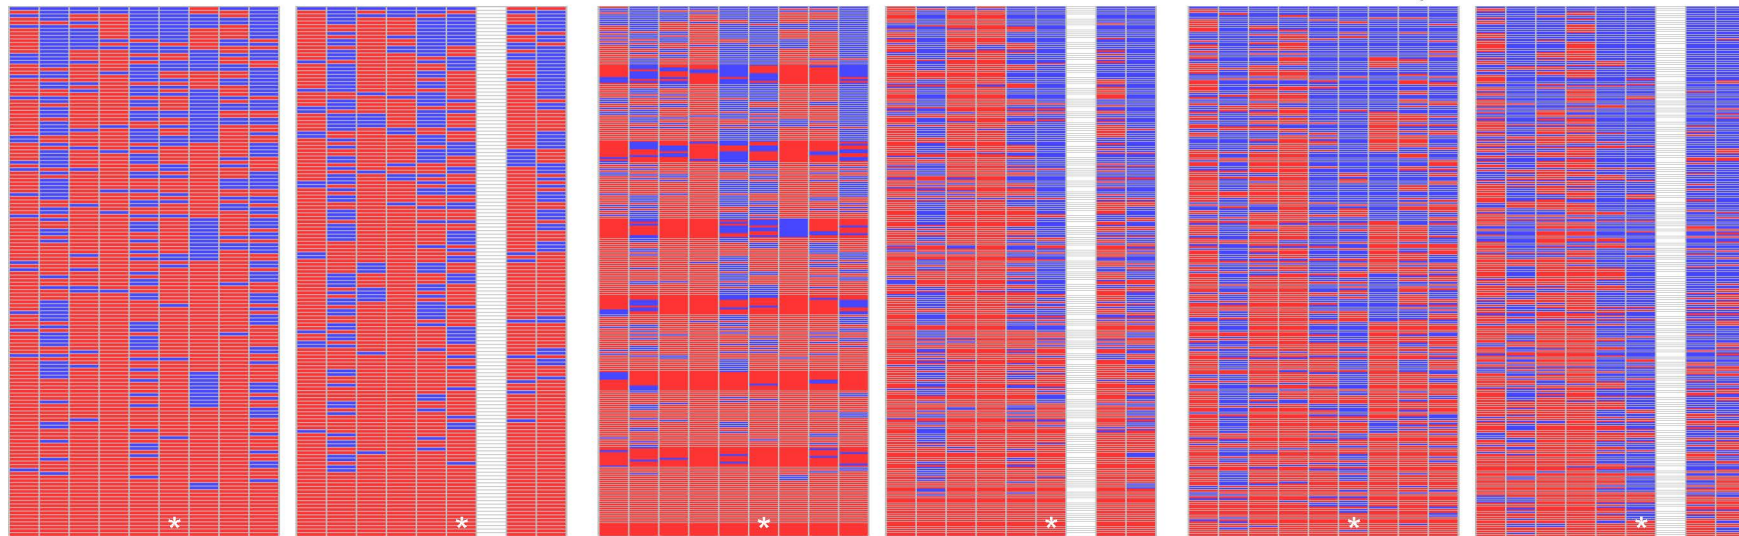

Allele  
Methylation [%]  
# of reads

G  
71.3  
148

C  
74.6  
149

G  
73.8  
278

C  
64.9  
291

G  
54.9  
252

C  
45.3  
302

**B****Figure S2*****KCNAB3***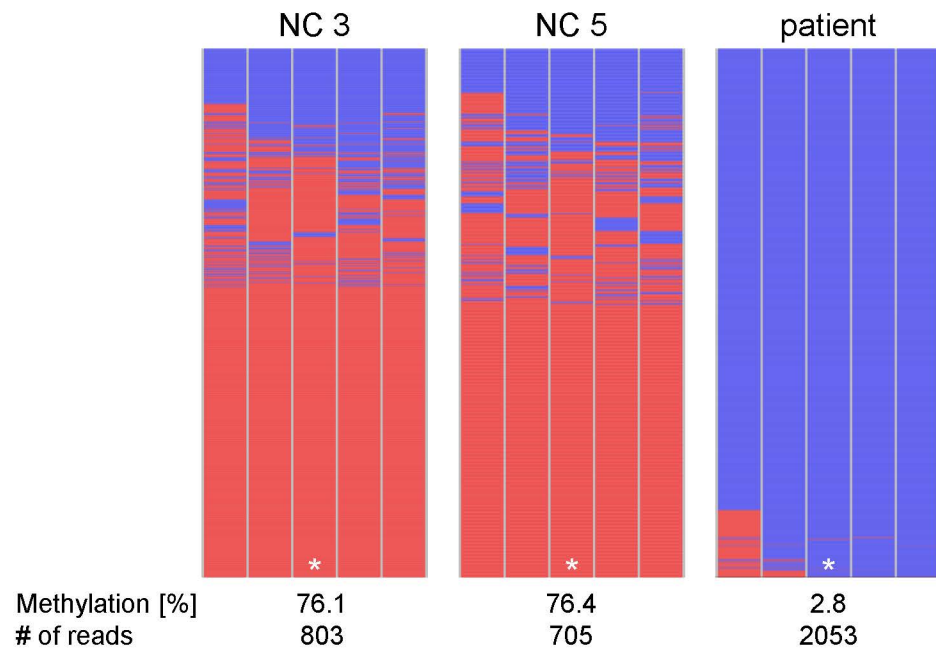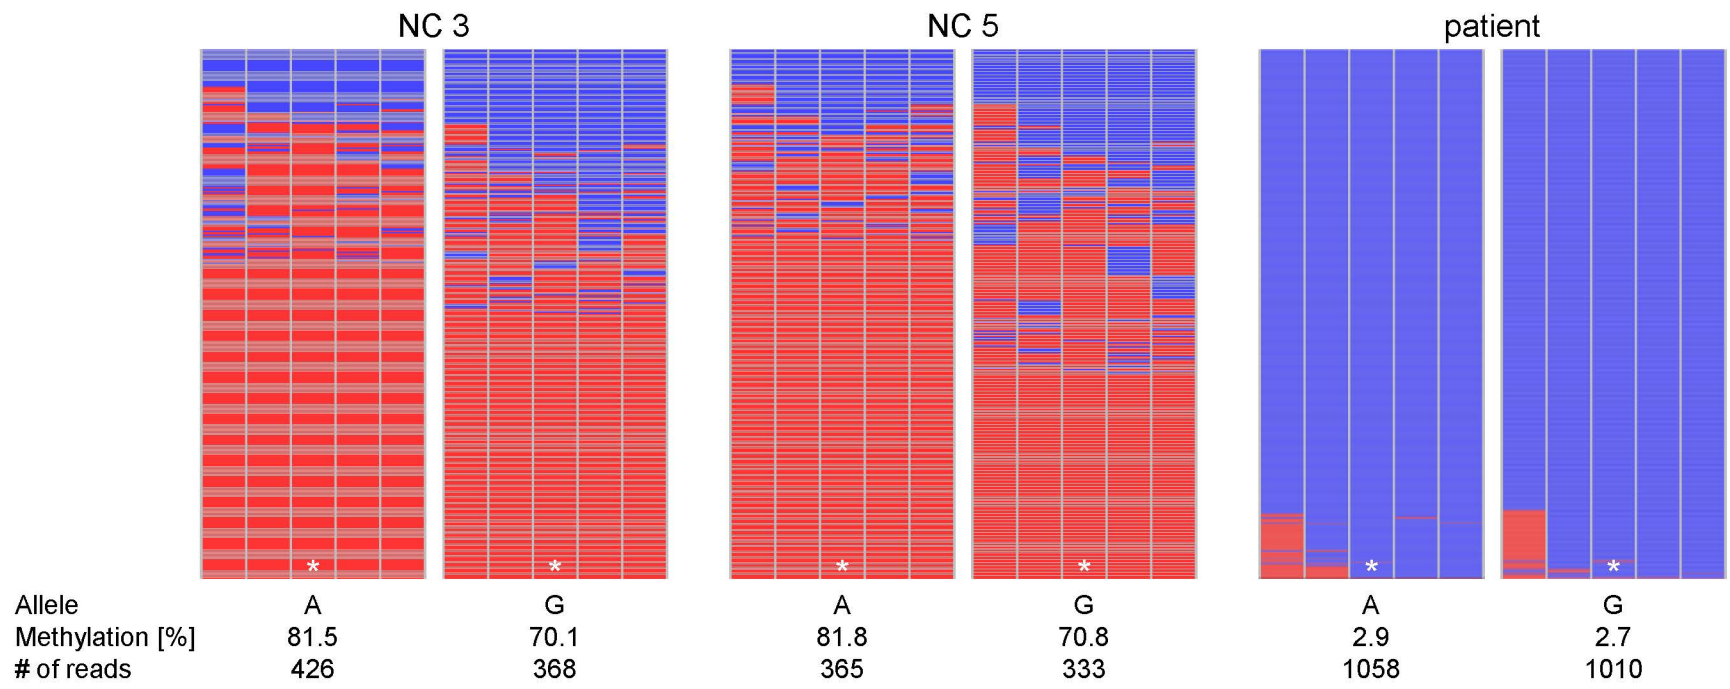

**C****Figure S2*****MAMDC2***

NC 2

NC 5

patient

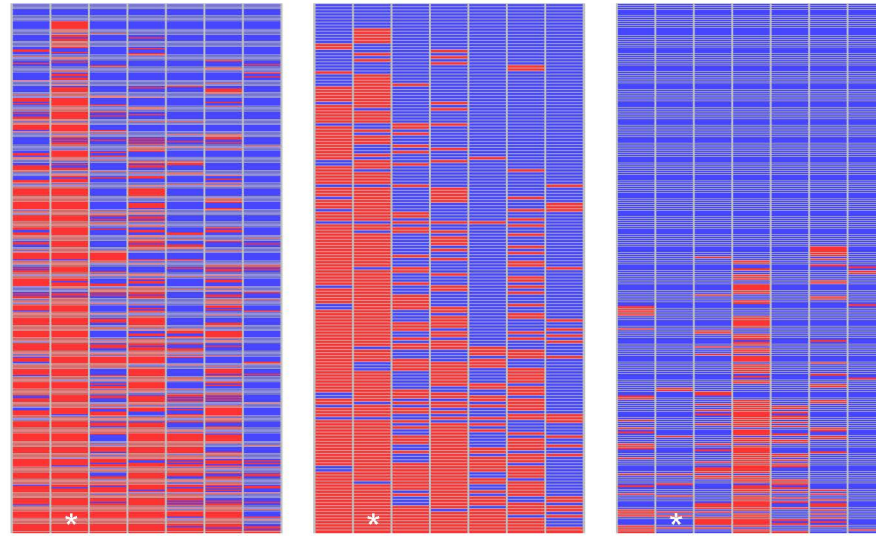

Methylation [%]  
# of reads

44.9  
393

45.6  
173

12.1  
266

NC 2

NC 5

patient

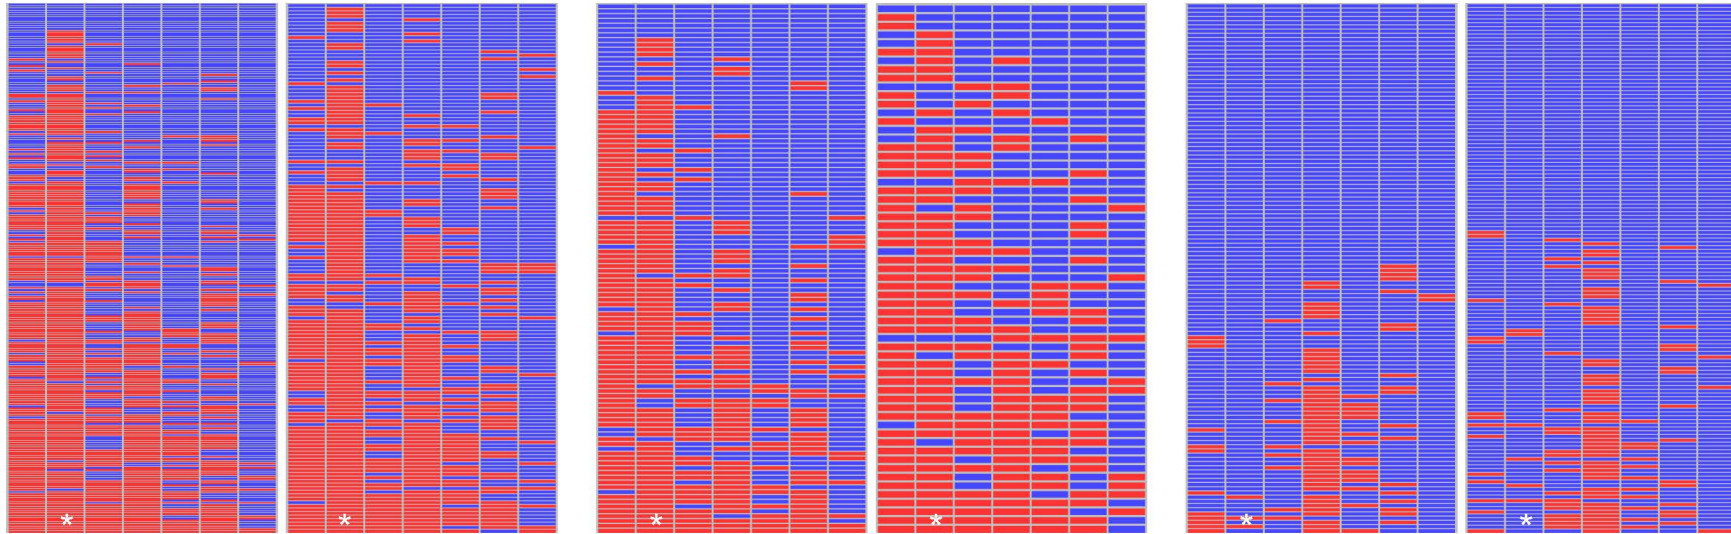

Allele  
Methylation [%]  
# of reads

C  
44.6  
241

A  
44.3  
149

C  
40.9  
110

A  
50.6  
61

C  
12.3  
140

A  
11.9  
126

**D****Figure S2*****TSPO***

NC 18

NC 19

patient

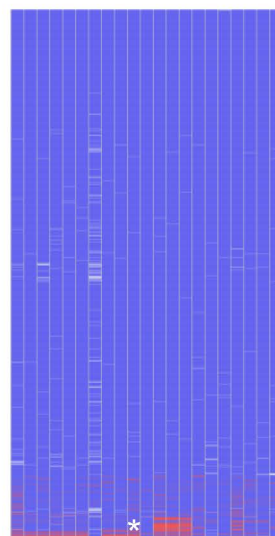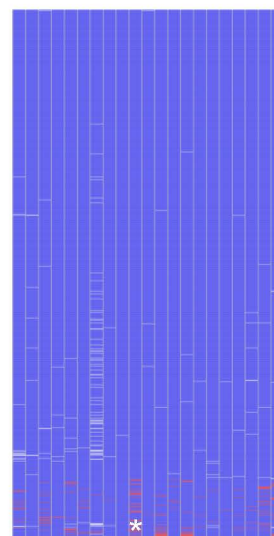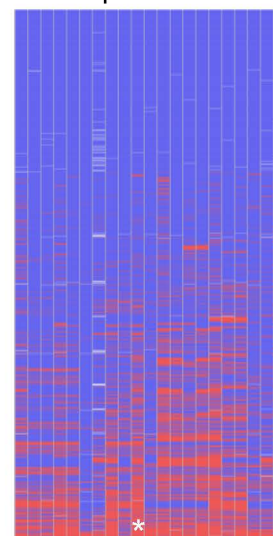Methylation [%]  
# of reads1.5  
26810.7  
141618.3  
1993

NC 18

NC 19

patient

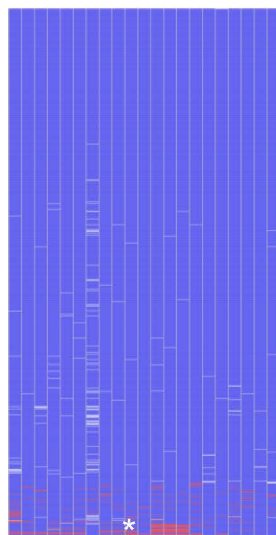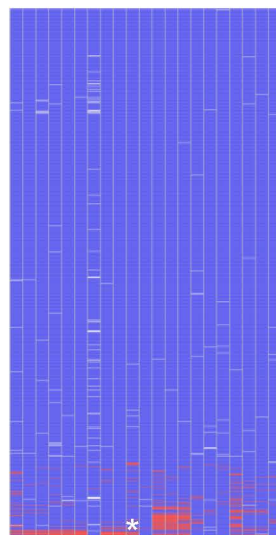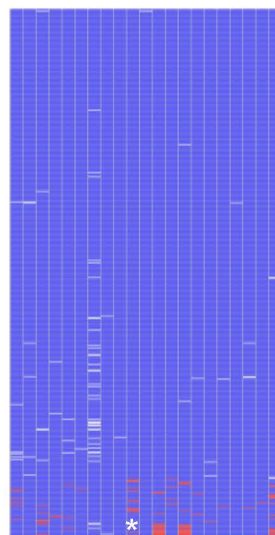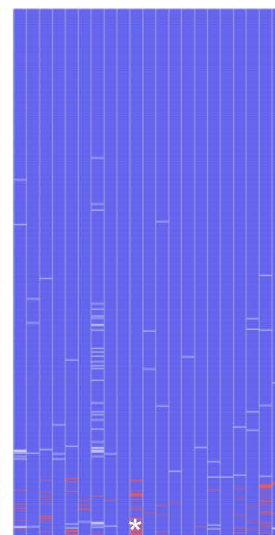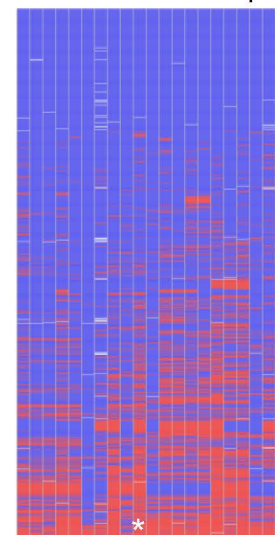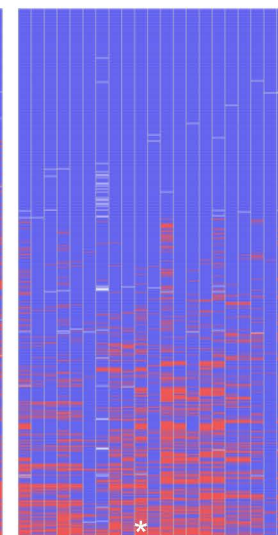Allele  
Methylation [%]  
# of readsG  
1.0  
1415T  
2.0  
1252G  
0.8  
645T  
0.6  
769G  
22.4  
1066T  
13.5  
922
