# Supplementary material
Source: publisher figshare collection journal article supplement (https://plos.figshare.com/articles/dataset/_/818752)
Supplement: Supplementary file 1 [file 1 › Figure_S3.pdf]

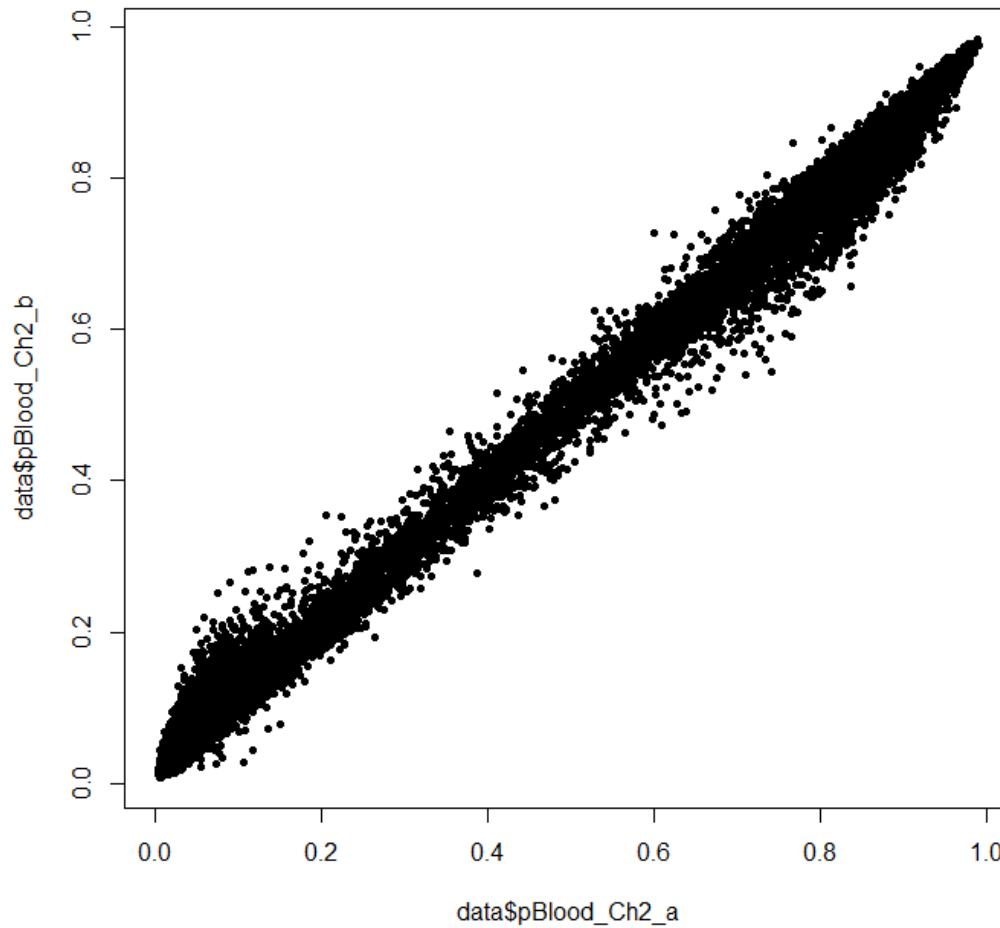

2 independent hybridisations  
(peripheral blood, patient)

coefficient of determination:

Pearson: 0.9980

Spearman: 0.9718
