# Supplementary material
Source: publisher figshare collection journal article supplement (https://plos.figshare.com/articles/dataset/_/818752)
Supplement: Supplementary file 1 [file 1 › Table_S1.xls]

## Sheet: Table S1.
Table S1. CpGs displaying aberrant methylation in the patient.
TargetID	SYMBOL	CHR	MAPINFO	patient (average of technical replicates)	mother (average of technical replicates)	father (average of technical replicates)	NC a	NC b	NC c	NC e	NC f	NC g	NC h	NC i	NC j	NC k	NC l	NC m	NC n	NC o	NC p	NC q	NC s	NC t		average NC and parents	Minimum NC and parents	Maximum NCs and parents
cg12024906	HKR1	19	42517519	0.0204347	0.247027	0.391541	0.673722	0.423529	0.317992	0.637396	0.544276	0.537251	0.441711	0.408589	0.292406	0.542218	0.534221	0.230343	0.474717	0.562527	0.310864	0.39756	0.477899	0.433327		0.443956	0.230343	0.673722
cg26372517	TFAP2E	1	35811746	0.0359647	0.283788	0.222461	0.493906	0.531292	0.343132	0.442542	0.252989	0.15332	0.254255	0.324904	0.424577	0.306392	0.474039	0.312993	0.339248	0.405205	0.273419	0.358041	0.267564	0.308611		0.338634	0.15332	0.531292
cg12759554	NAP1L5	4	89837660	0.0452063	0.536883	0.513132	0.548126	0.577152	0.573998	0.61597	0.561237	0.595056	0.580975	0.635525	0.57715	0.605378	0.587997	0.55177	0.639642	0.618785	0.661982	0.616368	0.645916	0.598059		0.592055	0.513132	0.661982
cg03641225	DIRAS3	1	68285127	0.0635783	0.341592	0.331942	0.31988	0.404901	0.363777	0.53971	0.388758	0.323502	0.253672	0.407984	0.267472	0.423299	0.523341	0.265401	0.320742	0.473135	0.442157	0.480655	0.374353	0.476071		0.386117	0.253672	0.53971
cg15915418	TLE1	9	83493421	0.0677746	0.114915	0.448328	0.0910814	0.0743264	0.0780508	0.457045	0.477264	0.0531242	0.0841891	0.51259	0.0620203	0.564093	0.501935	0.067828	0.504985	0.462749	0.494138	0.0918363	0.526463	0.559491		0.311323	0.0531242	0.564093
cg14918082	KCNAB3	17	7773962	0.0633606	0.889899	0.791507	0.858672	0.861442	0.853509	0.878715	0.841263	0.693527	0.900114	0.847324	0.929678	0.731777	0.92788	0.884642	0.844495	0.89668	0.876071	0.938023	0.812965	0.888688		0.857344	0.693527	0.938023
cg16153267	RB1	13	47791969	0.0676759	0.432958	0.407373	0.439221	0.472811	0.419643	0.554717	0.500792	0.386189	0.503004	0.448846	0.594976	0.50428	0.514563	0.453789	0.474074	0.608838	0.630173	0.529815	0.474301	0.478768		0.491457	0.386189	0.630173
cg18481241	RB1	13	47791728	0.0818977	0.55408	0.531098	0.566848	0.640535	0.536681	0.55859	0.465863	0.606482	0.466628	0.546137	0.65149	0.576713	0.566481	0.537669	0.519262	0.680203	0.682628	0.54476	0.613431	0.642519		0.574405	0.465863	0.682628
cg03085377	RB1	13	47791377	0.071881	0.47917	0.492748	0.39993	0.382924	0.483283	0.491806	0.478139	0.45592	0.485764	0.45308	0.543739	0.46799	0.490347	0.463469	0.600827	0.58412	0.499388	0.525371	0.4694	0.475741		0.486158	0.382924	0.600827
cg03933322	CSAD	12	51860404	0.0706127	0.101758	0.0634884	0.0692074	0.277303	0.487918	0.477658	0.484625	0.3573	0.395498	0.469613	0.512602	0.503556	0.448031	0.366754	0.436466	0.480832	0.421332	0.426455	0.466367	0.433965		0.384036	0.0634884	0.512602
cg14920846	NAV1	1	199884832	0.0805269	0.545058	0.490782	0.45351	0.396107	0.669253	0.512961	0.576473	0.491361	0.87979	0.573499	0.425343	0.330958	0.437445	0.58671	0.580362	0.63516	0.672539	0.640953	0.683014	0.465538		0.552341	0.330958	0.87979
cg13431205	RB1	13	47791175	0.0777338	0.483211	0.485261	0.548199	0.593769	0.519982	0.56016	0.605659	0.51763	0.585975	0.640597	0.628574	0.592685	0.554955	0.551064	0.675269	0.658766	0.57218	0.558358	0.652718	0.616639		0.580083	0.483211	0.675269
cg01026744	NAP1L5	4	89838076	0.0852306	0.652627	0.64845	0.756786	0.0718472	0.725057	0.751959	0.76239	0.779025	0.0515494	0.737993	0.733908	0.696566	0.686979	0.715961	0.763995	0.731972	0.747758	0.740434	0.736928	0.742036		0.661711	0.0515494	0.779025
cg19254235	RB1	13	47793174	0.121331	0.410259	0.42295	0.424028	0.507898	0.470948	0.420376	0.457165	0.485282	0.469054	0.569355	0.513539	0.434492	0.452576	0.526649	0.471275	0.537253	0.46447	0.434431	0.461062	0.4961		0.471458	0.410259	0.569355
cg25350411	PLAGL1	6	144370610	0.103216	0.552825	0.527025	0.479448	0.450345	0.498436	0.51565	0.439461	0.494949	0.54593	0.535587	0.504229	0.498645	0.549339	0.481471	0.462972	0.454289	0.565324	0.555577	0.49101	0.538892		0.50707	0.439461	0.565324
cg09118625	DIRAS3	1	68285559	0.0968716	0.72049	0.735377	0.768452	0.880697	0.670077	0.852883	0.724824	0.757054	0.744943	0.800105	0.681418	0.742773	0.861336	0.657761		0.878316	0.808762	0.847902	0.824031	0.843679		0.778994	0.657761	0.880697
cg25780543	HTR5A	7	154493703	0.100048	0.267386	0.299366	0.258801	0.354969	0.352861	0.389441	0.370537	0.436875	0.129924	0.232014	0.276056	0.453444	0.531154	0.465617	0.451454	0.427519	0.430974	0.4304	0.459247	0.440049		0.372904	0.129924	0.531154
cg17791651	POU3F1	1	38286076	0.110139	0.506865	0.637675	0.636011	0.628848	0.653156	0.628677	0.547093	0.53476	0.700496	0.703072	0.606022	0.562812	0.60754	0.533384	0.722526	0.625329	0.589778	0.623105	0.589429	0.60553		0.612105	0.506865	0.722526
cg13870494	MAMDC2	9	71848178	0.11855	0.682588	0.726519	0.711836	0.76135	0.782549	0.794073	0.765361	0.835859	0.711667	0.779547	0.779762	0.802599	0.792284	0.752583	0.747534	0.739722	0.799827	0.754645	0.800603	0.796493		0.76587	0.682588	0.835859
cg11465163	DIRAS3	1	68288681	0.118893	0.471001	0.460659	0.527537	0.488588	0.552221	0.499205	0.523827	0.493798	0.48194	0.485297	0.494937	0.604818	0.463564	0.571778	0.475371	0.539809	0.544042	0.513929	0.578664	0.442516		0.510675	0.442516	0.604818
cg17895149	PLAGL1	6	144371522	0.123158	0.613285	0.577092	0.691176	0.573425	0.535696	0.661196	0.55121	0.648506	0.662064	0.590247	0.644931	0.644982	0.625118	0.694625	0.690076	0.664151	0.653976	0.725184	0.612327	0.684298		0.637178	0.535696	0.725184
cg10784813	SOCS1	16	11256179	0.141488	0.570213	0.51549	0.676174	0.557678	0.691376	0.690152	0.500121	0.400339	0.591593	0.655377	0.586843	0.602816	0.614681	0.600338	0.737333	0.568991	0.520483	0.74728	0.566538	0.63247		0.601314	0.400339	0.74728
cg06191076	DIRAS3	1	68289051	0.128305	0.502544	0.49088	0.527479	0.60772	0.597566	0.555686	0.49525	0.536427	0.491586	0.536467	0.528344	0.521168	0.558588	0.502699	0.4942	0.564769	0.517252	0.532209	0.544718	0.606315		0.535593	0.49088	0.60772
cg20831708	SEC31L2=SEC31B	10	102269363	0.141794	0.508127	0.561321	0.6295	0.499254	0.591196	0.711646	0.587618	0.401305	0.762988	0.357509	0.686738	0.55908	0.736622	0.573816	0.642377	0.600927	0.532483	0.75751	0.493624	0.706983		0.595031	0.357509	0.762988
cg07880715	RB1	13	47793479	0.142394	0.571164	0.578936	0.609169	0.546392	0.622268	0.639344	0.621455	0.596583	0.669936	0.699598	0.707491	0.644589	0.590273	0.567852	0.672919	0.698765	0.704127	0.747143	0.67127	0.61382		0.638655	0.546392	0.747143
cg22901840	DIRAS3	1	68285365	0.121379	0.679608	0.68733	0.686097	0.721405	0.581605	0.775082	0.642504	0.609057	0.714061	0.753739	0.630143	0.655711	0.826923	0.576787	0.798129	0.773987	0.73683	0.697329	0.732768	0.772794		0.702595	0.576787	0.826923
cg21808053	DIRAS3	1	68285651	0.144739	0.470524	0.47756	0.411235	0.556384	0.437374	0.46886	0.444867	0.501779	0.37992	0.528273	0.464405	0.526215	0.580713	0.378591	0.607651	0.583803	0.633632	0.522168	0.509668	0.510852		0.499724	0.378591	0.633632
cg24871743	DIRAS3	1	68285238	0.145236	0.492541	0.585344	0.467928	0.605735	0.400267	0.454156	0.546656	0.466085	0.462623	0.540052	0.433586	0.463508	0.710504	0.507621	0.385681	0.573171	0.578818	0.399306	0.660624	0.651515		0.519286	0.385681	0.710504
cg05392265	DIRAS3	1	68289041	0.151381	0.521082	0.508947	0.543491	0.602208	0.587792	0.592229	0.602846	0.582368	0.578415	0.609421	0.613114	0.496817	0.564014	0.546558	0.584394	0.610009	0.59236	0.609887	0.620101	0.548612		0.575733	0.496817	0.620101
cg02849695	CCDC19	1	158136584	0.163282	0.444076	0.444341	0.532503	0.494953	0.466214	0.626386	0.360848	0.408703	0.57983	0.418558	0.469723	0.43313	0.460359	0.472816	0.453612	0.53593	0.47848	0.363703	0.379384	0.456765		0.464016	0.360848	0.626386
cg25836301	MEG3	14	100362059	0.177895	0.534684	0.518026	0.515959	0.611465	0.538051	0.516253	0.481611	0.577063	0.536615	0.502916	0.587819	0.53993	0.530461	0.511872	0.572121	0.534943	0.585383	0.584778	0.557209	0.579609		0.545838	0.481611	0.611465
cg22500004	DIRAS3	1	68288860	0.169026	0.552712	0.549063	0.541918	0.59564	0.576092	0.57795	0.599687	0.588397	0.660178	0.60157	0.599231	0.566399	0.576112	0.581118	0.606526	0.635897	0.552292	0.547498	0.556818	0.575297		0.58202	0.541918	0.660178
cg00059930	RB1	13	47792383	0.156583	0.605655	0.511645	0.764071	0.734294	0.661524	0.818189	0.696073	0.66586	0.767686	0.741954	0.746937	0.696152	0.684512	0.694836	0.799176	0.770757	0.777694	0.691975	0.663753	0.728996		0.711087	0.511645	0.818189
cg01570885	FAM50B	6	3794271	0.193142	0.545387	0.480759	0.493877	0.504648	0.536392	0.463084	0.514902	0.471658	0.550761	0.532739	0.518715	0.502952	0.514473	0.472226	0.486472	0.502527	0.508944	0.543351	0.538359	0.536823		0.510952	0.463084	0.550761
cg16848873	HOXB6	17	44037307	0.197974	0.592872	0.374887	0.666171	0.497868	0.476937	0.752605	0.615809	0.500345	0.706037	0.658662	0.556018	0.459568	0.574865	0.626627	0.622822	0.535428	0.775748	0.44327	0.565541	0.337949		0.567001	0.337949	0.775748
cg19427472	RB1	13	47790949	0.189886	0.770461	0.738841	0.732104	0.807596	0.733692	0.775396	0.734714	0.786325	0.840553	0.781271	0.844596	0.803925	0.819674	0.789704	0.851227	0.761421	0.821456	0.793539	0.817037	0.785173		0.789435	0.732104	0.851227
cg16492735	PEG10	7	94124144	0.196063	0.483094	0.463561	0.508132	0.554779	0.431648	0.42881	0.443067	0.505656	0.517325	0.508551	0.530296	0.558004	0.541981	0.461606	0.518789	0.519086	0.490621	0.501989	0.511888	0.540511		0.50097	0.42881	0.558004
cg16148270	DIRAS3	1	68289053	0.189679	0.587387	0.59178	0.680603	0.739444	0.672641	0.71718	0.644327	0.713474	0.45725	0.760186	0.661863	0.653818	0.685297	0.615583	0.728751	0.71152	0.626278	0.673442	0.720581	0.66964		0.665552	0.45725	0.760186
cg14893161	FLJ32569	1	204085874	0.203801	0.141103	0.200439	0.584989	0.848966	0.889631	0.591604	0.344147	0.648669	0.24078	0.577249	0.915195	0.264987	0.608873	0.557234	0.400198	0.572652	0.494713	0.563119	0.508614	0.273041		0.51131	0.141103	0.915195
cg13697378	DIRAS3	1	68285433	0.201291	0.590332	0.63315	0.663638	0.742177	0.647869	0.78456	0.613791	0.633368	0.658558	0.689865	0.609665	0.662567	0.792716	0.626407	0.721249	0.734871	0.719478	0.696112	0.715937	0.734206		0.683526	0.590332	0.792716
cg18533225	KLHDC7B	22	49333679	0.218796	0.641619	0.653622	0.726938	0.595588	0.640128	0.726291	0.590435	0.735661	0.556522	0.598827	0.650488	0.686643	0.612316	0.646853	0.635391	0.748403	0.579013	0.646879	0.679422	0.71336		0.65322	0.556522	0.748403
cg19728382	STC2	5	172689882	0.221854	0.483039	0.562585	0.537436	0.56023	0.591048	0.601301	0.548171	0.494941	0.52531	0.636754	0.540742	0.597826	0.45697	0.442186	0.587559	0.63053	0.626988	0.584951	0.56549	0.59157		0.558281	0.442186	0.636754
cg13828758	NDN	15	21483466	0.222852	0.501677	0.522255	0.609507	0.611508	0.558912	0.662213	0.592401	0.581711	0.675734	0.643583	0.623354	0.622742	0.64911	0.538453	0.705841	0.55054	0.547332	0.660687	0.571563	0.556708		0.599291	0.501677	0.705841
cg02489552	FLJ40365=CCDC105	19	14982531	0.222536	0.521633	0.590713	0.631629	0.619025	0.557952	0.699854	0.580481	0.613368	0.553794	0.556001	0.536736	0.548891	0.578874	0.487642	0.668395	0.642413	0.665655	0.572341	0.659571	0.671973		0.597847	0.487642	0.699854
cg03336167	SLC22A18	11	2887571	0.23803	0.524871	0.588356	0.698027	0.666667	0.831402	0.658041	0.559458	0.436435	0.760843	0.712439	0.642641	0.651773	0.772987	0.644498	0.740355	0.644398	0.777865	0.816348	0.610526	0.701559		0.671974	0.436435	0.831402
cg18474934	TRPC3	4	123073415	0.236238	0.529653	0.515792	0.630247	0.65732	0.630284	0.610746	0.602418	0.65838	0.53172	0.672619	0.518783	0.665095	0.413627	0.669428	0.783819	0.636774	0.647728	0.637066	0.769393	0.675431		0.622816	0.413627	0.783819
cg02317907	DIRAS3	1	68288376	0.270284	0.573252	0.577624	0.572411	0.659549	0.606115	0.588328	0.598097	0.564662	0.598047	0.623422	0.592406	0.597185	0.620814	0.62887	0.66505	0.614012	0.609302	0.667122	0.686268	0.651358		0.614695	0.564662	0.686268
cg18506672	SNURF	15	22751346	0.285927	0.543874	0.489764	0.534494	0.45531	0.588223	0.598268	0.635488	0.710484	0.430865	0.615247	0.595725	0.642127	0.56196	0.577871	0.532065	0.547263	0.605507	0.591124	0.609073	0.639975		0.575235	0.430865	0.710484
cg25431974	ECEL1	2	233061180	0.278863	0.751585	0.719988	0.752762	0.848428	0.759579	0.757896	0.723111	0.768858	0.801543	0.800109	0.560564	0.752634	0.754065	0.761659	0.834123	0.765062	0.855688	0.799039	0.735163	0.751086		0.762647	0.560564	0.855688
cg08263357	PLAGL1	6	144371473	0.274431	0.713584	0.717262	0.770797	0.596758	0.775732	0.794111	0.742911	0.810469	0.864651	0.755736	0.680486	0.803987	0.765741	0.796581	0.840414	0.765312	0.791211	0.791088	0.751743	0.754287		0.764143	0.596758	0.864651
cg05711886	MEG3	14	100362433	0.293086	0.593125	0.598566	0.676953	0.77281	0.616845	0.675834	0.57532	0.667479	0.64655	0.641087	0.623323	0.631397	0.633419	0.587221	0.666251	0.674875	0.638859	0.701554	0.695997	0.673531		0.64955	0.57532	0.77281
cg16488522	KRT25C	17	36193658	0.307648	0.603622	0.328564	0.677976	0.671498	0.752047	0.713933	0.743182	0.717579	0.727534	0.75938	0.75392	0.702678	0.771479	0.616312	0.620301	0.646947	0.713835	0.672549	0.682489	0.598822		0.673732	0.328564	0.771479
cg01185080	ZNF710	15	88344817	0.292396	0.555158	0.608265	0.616637	0.539597	0.634276	0.69885	0.668602	0.582257	0.746532	0.705206	0.605787	0.657313	0.730917	0.561157	0.764548	0.647612	0.490509	0.664418	0.63463	0.626929		0.63696	0.490509	0.764548
cg21745164	LOC63928 (CHP2)	16	23672805	0.312096	0.592759	0.645297	0.623986	0.687361	0.594808	0.742076	0.588125	0.623486	0.640118	0.58006	0.578565	0.605251	0.713098	0.724431	0.677382	0.573045	0.558089	0.691287	0.580174	0.671762		0.634558	0.558089	0.742076
cg08012287	ACTN3	11	66071874	0.323237	0.691546	0.708204	0.69767	0.748855	0.710649	0.650871	0.730717	0.700259	0.795282	0.708368	0.674226	0.729256	0.712228	0.723235	0.808294	0.772896	0.722066	0.680357	0.713757	0.747798		0.721327	0.650871	0.808294
cg07077459	PLAGL1	6	144370745	0.328609	0.728496	0.709011	0.807589	0.863002	0.841965	0.850077	0.80895	0.86501	0.895073	0.889811	0.802507	0.856847	0.80997	0.807334	0.912725	0.815917	0.825627	0.851541	0.848592	0.790454		0.829025	0.709011	0.912725
cg17769238	H19	11	1976144	0.329968	0.604496	0.588862	0.626056	0.618052	0.626368	0.633976	0.650253	0.629457	0.692362	0.712058	0.681711	0.644628	0.61972	0.621966	0.662127	0.619981	0.656691	0.648678	0.607393	0.595278		0.637006	0.588862	0.712058
cg08471713	MEOX1	17	39094419	0.3533	0.512769	0.490813	0.583033	0.449931	0.474538	0.616751	0.528478	0.858097	0.537313	0.801763	0.656385	0.944216	0.583372	0.863017	0.470051	0.922989	0.522124	0.837694	0.511595	0.657528		0.641123	0.449931	0.944216
cg15373285	MEG3	14	100362843	0.326118	0.611597	0.602236	0.635524	0.689164	0.722357	0.710486	0.694472	0.650224	0.696809	0.718843	0.685175	0.701118	0.696806	0.667583	0.728368	0.647725	0.727373	0.721749	0.692663	0.711304		0.685579	0.602236	0.728368
cg16003238	PUNC	15	63457929	0.335898	0.604433	0.636603	0.700328	0.640386	0.672609	0.614082	0.693489	0.576912	0.732028	0.78677	0.574026	0.663362	0.661356	0.639144	0.716386	0.763343	0.735868	0.5736	0.712978	0.624497		0.66611	0.5736	0.78677
cg27182551	RB1	13	47790552	0.380235	0.828343	0.82887	0.842569	0.873173	0.877115	0.839492	0.77508	0.793342	0.897001	0.87904	0.874264	0.891628	0.888528	0.880764	0.889176	0.892827	0.808163	0.91344	0.851265	0.890204		0.860714	0.77508	0.91344
cg00702231	PLAGL1	6	144371166	0.368582	0.716998	0.694883	0.781548	0.872184	0.766629	0.813436	0.816353	0.892171	0.903461	0.830044	0.807369	0.86646	0.85775	0.78867	0.881141	0.783597	0.865194	0.841515	0.854983	0.824802		0.822959	0.694883	0.903461
cg00343092	BZRP=TSPO	22	41877918	0.37695	0.117767	0.0518658	0.0243296	0.0382322	0.034496	0.0356079	0.0775028	0.0389477	0.0204529	0.0583302	0.0543943	0.0723958	0.0214652	0.0712182	0.0181659	0.0272189	0.0242659	0.0299652	0.0312739	0.0624514		0.0455173	0.0181659	0.117767
cg09307264	INCA1	17	4843005	0.393754	0.679279	0.653824	0.742427	0.660503	0.657888	0.785828	0.596944	0.640868	0.621947	0.732851	0.693925	0.665686	0.68829	0.690009	0.678737	0.710801	0.697492	0.713732	0.727634	0.796181		0.691742	0.596944	0.796181
cg12757684	PLAGL1	6	144371178	0.361322	0.626835	0.615755	0.703757	0.733354	0.682343	0.715967	0.684644	0.742713	0.767804	0.657057	0.761557	0.746325	0.68301	0.687675	0.77817	0.677361	0.735666	0.687272	0.717461	0.68729		0.704601	0.615755	0.77817
cg21755709	C21orf124	21	43973826	0.410087	0.611274	0.669559	0.620262	0.52439	0.705773	0.746607	0.700087	0.750062	0.657434	0.651985	0.718371	0.737968	0.720573	0.7376	0.690713	0.726552	0.739548	0.697822	0.723829	0.767111		0.694876	0.52439	0.767111
cg15534366	CDH4	20	59259602	0.371219	0.728316	0.669619	0.654581	0.645042	0.755563	0.799302	0.779515	0.585125	0.654945	0.727194	0.721163	0.636285	0.625798	0.734899	0.615836	0.648119	0.705231	0.651549	0.731934	0.73649		0.690325	0.585125	0.799302
cg22378065	PLAGL1	6	144370865	0.392742	0.669684	0.650883	0.734052	0.782895	0.763264	0.771938	0.725161	0.850716	0.812387	0.747031	0.760208	0.796179	0.788825	0.714457	0.85185	0.791882	0.733467	0.787266	0.752734	0.767314		0.76261	0.650883	0.85185
cg18433380	NNAT	20	35582608	0.369388	0.630566	0.647662	0.783729	0.7793	0.683987	0.692766	0.789772	0.619978	0.696231	0.69614	0.65873	0.815534	0.705489	0.665561	0.638237	0.629749	0.721128	0.712372	0.761797	0.666346		0.699754	0.619978	0.815534
cg05294455	MYL4	17	42641608	0.384293	0.703952	0.657063	0.701775	0.769405	0.681849	0.692514	0.654284	0.682666	0.745793	0.72354	0.828372	0.685748	0.761466	0.750369	0.78529	0.673084	0.698562	0.779584	0.728491	0.748421		0.722611	0.654284	0.828372
cg02932167	ECEL1	2	233061195	0.414333	0.72321	0.665151	0.698652	0.797913	0.705695	0.722627	0.758531	0.76973	0.760321	0.776229	0.725328	0.645948	0.73565	0.72128	0.827503	0.738615	0.796371	0.780615	0.73713	0.745316		0.741591	0.645948	0.827503
cg25167447	NAV1	1	199883665	0.397985	0.662511	0.634504	0.729917	0.656658	0.808137	0.808421	0.789889	0.61017	0.700226	0.871816	0.821631	0.836752	0.818444	0.846774	0.694872	0.806813	0.782189	0.81518	0.812939	0.815651		0.766175	0.61017	0.871816
cg11213150	ANGPTL2	9	128924278	0.400703	0.698671	0.665361	0.701365	0.692012	0.663994	0.712501	0.578774	0.722002	0.731691	0.711636	0.555035	0.621973	0.633605	0.729474	0.740924	0.712192	0.740816	0.727341	0.671015	0.670883		0.684063	0.555035	0.740924
cg08835688	GRB10	7	50817425	0.395683	0.666013	0.646982	0.699654	0.738183	0.671847	0.718724	0.700687	0.797239	0.777397	0.701645	0.700449	0.702745	0.783462	0.690577	0.790026	0.691739	0.685304	0.749107	0.7165	0.662592		0.714544	0.646982	0.797239
cg20028470	UCN	2	27384333	0.396249	0.607241	0.604516	0.753672	0.710125	0.634083	0.772833	0.655451	0.603298	0.568208	0.611497	0.70914	0.667534	0.723997	0.681515	0.674276	0.727602	0.741944	0.724584	0.718361	0.741859		0.681587	0.568208	0.772833
cg09022808	GAL3ST1	22	29290857	0.422228	0.705823	0.660921	0.71651	0.764734	0.744857	0.685536	0.7112	0.828155	0.707995	0.764512	0.80807	0.734682	0.74204	0.803999	0.723789	0.808436	0.710278	0.792057	0.788415	0.789553		0.749578	0.660921	0.828155
cg22463915	EEF1A2	20	61601704	0.42982	0.642242	0.622097	0.804337	0.562657	0.571876	0.765473	0.821374	0.722585	0.708071	0.801115	0.590131	0.764653	0.643077	0.681037	0.862704	0.782533	0.746585	0.629835	0.74519	0.808736		0.713815	0.562657	0.862704
cg22298088	NNAT	20	35582274	0.417219	0.627572	0.676586	0.747016	0.789639	0.751426	0.684301	0.773633	0.676117	0.717842	0.664904	0.735244	0.78673	0.664166	0.712107	0.738268	0.702797	0.685075	0.703586	0.740014	0.72591		0.715147	0.627572	0.789639
cg17980508	IFI44L	1	78858301	0.432738	0.192322	0.214551	0.140601	0.1375	0.149478	0.160982	0.151662	0.101793	0.161259	0.124874	0.109581	0.144911	0.103215	0.112447	0.13367	0.114423	0.108915	0.055434	0.112075	0.14913		0.133941	0.055434	0.214551
cg04463638	CLDN5	22	17892712	0.460015	0.757015	0.74832	0.731269	0.816736	0.736695	0.760695	0.788078	0.832778	0.735957	0.782816	0.777351	0.730877	0.816678	0.800614	0.76404	0.750579	0.728132	0.776196	0.816349	0.746356		0.769877	0.728132	0.832778
cg04726200	SLC22A18	11	2887061	0.465052	0.737004	0.769218	0.88773	0.86668	0.844744	0.807862	0.828352	0.718024	0.865275	0.80429	0.716609	0.720499	0.8113	0.819766	0.846175	0.71266	0.787214	0.915334	0.778713	0.75793		0.799769	0.71266	0.915334
cg03399459	ANXA8	10	47217088	0.457605	0.823977	0.445385	0.812633	0.817758	0.837316	0.853195	0.799047	0.851187	0.812419	0.864006	0.820967	0.84212	0.857407	0.864569	0.875662	0.808164	0.827908	0.841916	0.831986	0.81006		0.814884	0.445385	0.875662
cg26954174	CARD15 =NOD2	16	49288314	0.458707	0.136562	0.113909	0.107836	0.106448	0.11887	0.13858	0.121553	0.151745	0.0750596	0.130261	0.15811	0.1288	0.126697	0.190212	0.0738604	0.165735	0.120141	0.0768124	0.126297	0.0967022		0.12321	0.0738604	0.190212
cg19264571	APCDD1	18	10444085	0.491415	0.80583	0.829388	0.869525	0.854365	0.861513	0.886557	0.879718	0.798753	0.929753	0.880955	0.774327	0.902533	0.863984	0.889688	0.924824	0.875536	0.878447	0.863781	0.878586	0.86212		0.865509	0.774327	0.929753
cg01143454	C20orf141	20	2743601	0.47804	0.123081	0.125049	0.10101	0.137553	0.0919209	0.136747	0.140614	0.105334	0.0763317	0.0993799	0.19017	0.105999	0.0648074	0.0836653	0.103209	0.0674709	0.0861362	0.0694331	0.0885472	0.102265		0.104936	0.0648074	0.19017
cg05379350	GIT1	17	24941283	0.477541	0.240322	0.171708	0.125704	0.124384	0.15872	0.123926	0.214862	0.165475	0.0488498	0.168337	0.202986	0.2271	0.198968	0.172879	0.122908	0.173242	0.1875	0.131709	0.200832	0.168535		0.166447	0.0488498	0.240322
cg18895972	PELO	5	52118143	0.493162	0.33373	0.296756	0.197147	0.132436	0.142762	0.132424	0.172043	0.25036	0.132492	0.142325	0.187947	0.166375	0.127958	0.177596	0.0758725	0.171637	0.174573	0.165575	0.135922	0.23814		0.177704	0.0758725	0.33373
cg21988465	GNAS	20	56862672	0.461461	0.728202	0.672112	0.770102	0.66646	0.745809	0.770644	0.693606	0.789808	0.706136	0.791697	0.711463	0.820136	0.762161	0.721061	0.834192	0.723173	0.796694	0.761405	0.775609	0.738716		0.748959	0.66646	0.834192
cg21450627	PSD4	2	113647311	0.484702	0.82081	0.441684	0.854837	0.899172	0.87217	0.895525	0.870146	0.91858	0.911818	0.889466	0.895727	0.0308147	0.886368	0.851858	0.916169	0.853448	0.861976	0.897123	0.865121	0.838349		0.813558	0.0308147	0.91858
cg27371741	TDGF1	3	46594162	0.488048	0.517855	0.729921	0.824339	0.59073	0.851878	0.807386	0.827066	0.716135	0.71179	0.797494	0.830978	0.856617	0.851136	0.833855	0.738697	0.756367	0.84447	0.83195	0.864002	0.811992		0.779733	0.517855	0.864002
cg01420388	FBXO2	1	11636841	0.495489	0.755903	0.795039	0.832317	0.885271	0.699368	0.839551	0.829981	0.854027	0.859376	0.843956	0.824794	0.877131	0.914581	0.868143	0.937212	0.90527	0.78002	0.795245	0.867125	0.839197		0.840175	0.699368	0.937212
cg00660989	BTBD5	14	44502266	0.503838	0.305414	0.243576	0.151903	0.162014	0.275478	0.17999	0.338024	0.183673	0.0668744	0.171458	0.166325	0.349054	0.103567	0.266498	0.215142	0.142411	0.162312	0.221559	0.215323	0.178223		0.204941	0.0668744	0.349054
cg06800962	TM4SF1	3	150578719	0.55844	0.302296	0.295185	0.181549	0.271574	0.167454	0.154723	0.211391	0.155	0.124448	0.212714	0.192975	0.207887	0.189218	0.18666	0.221973	0.155232	0.164419	0.155459	0.185157	0.229279		0.19823	0.124448	0.302296
cg26955850	OXT	20	3000345	0.518841	0.312231	0.34002	0.173086	0.148848	0.178156	0.330251	0.252629	0.229136	0.110904	0.242906	0.222208	0.157209	0.206682	0.189286	0.255582	0.147533	0.234845	0.205974	0.256933	0.208816		0.220162	0.110904	0.34002
cg17465304	KIF12	9	115901263	0.528466	0.81766	0.787209	0.796363	0.891608	0.866558	0.856527	0.887332	0.81398	0.895875	0.855707	0.845658	0.774984	0.84799	0.880028	0.955916	0.808825	0.826469	0.828357	0.81203	0.874586		0.846183	0.774984	0.955916
cg09971811	CST7	20	24878099	0.539026	0.142349	0.156661	0.139121	0.169562	0.161407	0.284268	0.160897	0.328244	0.122827	0.2398	0.270907	0.308651	0.256578	0.398363	0.103465	0.266977	0.183705	0.139165	0.228578	0.305351		0.218344	0.103465	0.398363
cg21476940	ITLN1	1	159121578	0.513659	0.241001	0.216767	0.188364	0.243562	0.167997	0.0817348	0.183586	0.118956	0.22376	0.107196	0.184861	0.108077	0.0800821	0.155021	0.140903	0.184132	0.136143	0.157417	0.144401	0.0681818		0.156607	0.0681818	0.243562
cg26394940	FLJ10945	22	44828125	0.549206	0.16152	0.179389	0.0497026	0.0953128	0.055841	0.0767983	0.240159	0.0803545	0.0326425	0.0972984	0.06316	0.154498	0.050232	0.120269	0.122844	0.0762175	0.102444	0.0563778	0.0919037	0.0750267		0.0990995	0.0326425	0.240159
cg07922606	HIST1H3E	6	26333368	0.550436	0.949964	0.930602	0.975157	0.96125	0.977256	0.977367	0.971477	0.968817	0.975792	0.980048	0.980677	0.965906	0.981004	0.973329	0.966827	0.971583	0.969753	0.97836	0.973909	0.953496		0.969129	0.930602	0.981004
cg22858288	SLC22A18	11	2886898	0.573241	0.843057	0.876324	0.9028	0.815842	0.920404	0.884155	0.881267	0.844682	0.921786	0.889787	0.783189	0.822768	0.899194	0.910092	0.944065	0.837476	0.883339	0.915229	0.854374	0.911955		0.877089	0.783189	0.944065
cg13105904	KIAA0323	14	23969884	0.565691	0.436272	0.325491	0.184926	0.479835	0.111376	0.183173	0.11797	0.0957013	0.0356803	0.196449	0.351468	0.126085	0.151153	0.150373	0.032872	0.428163	0.0834315	0.0730769	0.414711	0.370843		0.217453	0.032872	0.479835
cg08872742	CDH5	16	64957821	0.56553	0.246982	0.284895	0.243902	0.201563	0.233665	0.257963	0.248016	0.383163	0.173849	0.29038	0.326143	0.23434	0.221003	0.297772	0.182211	0.266484	0.283828	0.23223	0.242482	0.266082		0.255848	0.173849	0.383163
cg26799474	CASP8	2	201807196	0.565331	0.26095	0.149072	0.159357	0.147283	0.212493	0.196938	0.146461	0.123785	0.157662	0.169049	0.205569	0.176541	0.183362	0.154198	0.151899	0.186135	0.119142	0.226044	0.214739	0.149086		0.174488	0.119142	0.26095
cg20392764	ASCL2	11	2249693	0.572181	0.840339	0.834585	0.862294	0.92265	0.850888	0.891549	0.925049	0.876722	0.940866	0.898543	0.787492	0.929025	0.853895	0.866835	0.956144	0.879885	0.870357	0.910607	0.889141	0.911974		0.884942	0.787492	0.956144
cg01739167	CHRNE	17	4747123	0.598033	0.29902	0.271888	0.255556	0.169751	0.287281	0.203145	0.221954	0.246992	0.172918	0.20372	0.223858	0.25839	0.319126	0.262526	0.115059	0.288874	0.232763	0.318986	0.270527	0.202591		0.241246	0.115059	0.319126
cg19497444	SLC22A18	11	2887370	0.602843	0.838885	0.877317	0.950777	0.916021	0.915896	0.88622	0.92489	0.874457	0.94735	0.909766	0.909208	0.887605	0.91719	0.93245	0.917239	0.86377	0.890185	0.948705	0.905201	0.906194		0.905966	0.838885	0.950777
cg03427831	MTHFR	1	11790040	0.60087	0.328663	0.287732	0.247832	0.234719	0.308613	0.290822	0.272193	0.306851	0.27774	0.270151	0.329592	0.305422	0.368656	0.34512	0.2054	0.342185	0.225978	0.308632	0.294556	0.277713		0.291428	0.2054	0.368656
cg17421623	C3orf9 (=KTELC1)	3	120670260	0.594436	0.233987	0.175258	0.267918	0.234108	0.297657	0.301017	0.243859	0.277647	0.208562	0.193232	0.181962	0.231229	0.257762	0.315547	0.140236	0.237406	0.225392	0.147381	0.277307	0.192759		0.232011	0.140236	0.315547
cg11314684	AKT3	1	242072911	0.616475	0.408032	0.270483	0.19866	0.17159	0.195745	0.19817	0.367978	0.29879	0.325758	0.26566	0.289741	0.193209	0.208573	0.282929	0.31572	0.222406	0.192551	0.275341	0.201402	0.292089		0.258741	0.17159	0.408032
cg22038738	PLAT	8	42183830	0.633901	0.742211	0.882702	0.925766	0.944251	0.914647	0.902627	0.928144	0.957823	0.961536	0.943686	0.949851	0.932039	0.914666	0.928236	0.945208	0.809808	0.923456	0.937375	0.935805	0.938229		0.915903	0.742211	0.961536
cg02789485	MGC39497	12	74069695	0.614684	0.263222	0.31862	0.275804	0.181347	0.288337	0.292881	0.216723	0.260142	0.164154	0.253883	0.234618	0.198292	0.270659	0.194166	0.245083	0.217902	0.21312	0.196502	0.327028	0.244281		0.242838	0.164154	0.327028
cg22730004	SPTA1	1	156923342	0.648717	0.389778	0.312278	0.109842	0.186966	0.094732	0.111487	0.218996	0.196657	0.0898876	0.156896	0.142792	0.110471	0.158879	0.209066	0.122507	0.102232	0.183393	0.0659537	0.200756	0.174594		0.166908	0.0659537	0.389778
cg02337447	SCO1	17	10542757	0.642027	0.435015	0.354033	0.266055	0.278458	0.31013	0.4101	0.344673	0.304148	0.267377	0.221172	0.30896	0.297017	0.245839	0.337534	0.265957	0.422981	0.296205	0.294858	0.290113	0.305812		0.312822	0.221172	0.435015
cg08090640	IFI35	17	38412815	0.659906	0.33465	0.254679	0.181373	0.232596	0.262635	0.18693	0.25641	0.404741	0.184615	0.330798	0.247579	0.305113	0.254571	0.337919	0.181699	0.233813	0.245142	0.352984	0.271526	0.308338		0.268406	0.181373	0.404741
cg25025243	GSTP1	11	67106810	0.694509	0.448655	0.500544	0.362135	0.425571	0.363418	0.317427	0.277326	0.337708	0.268199	0.359351	0.257605	0.419788	0.386503	0.379412	0.231977	0.258828	0.444497	0.306655	0.261345	0.476232		0.354159	0.231977	0.500544
cg25538571	FLJ46365	8	49665263	0.699031	0.426261	0.371949	0.290207	0.271678	0.421402	0.321983	0.386678	0.469577	0.337913	0.403091	0.393205	0.353936	0.336404	0.383793	0.357084	0.424803	0.398939	0.375545	0.437843	0.411179		0.378673	0.271678	0.469577
cg04123409	SDS	12	112326000	0.715535	0.389099	0.318487	0.247059	0.472017	0.354805	0.323695	0.318656	0.245038	0.155909	0.488971	0.284856	0.29632	0.246738	0.281608	0.22832	0.373313	0.235706	0.336375	0.309321	0.421956		0.316412	0.155909	0.488971
cg23771661	B3GNT3	19	17766332	0.697305	0.332632	0.306275	0.264745	0.354899	0.37169	0.449381	0.243033	0.483765	0.276995	0.617937	0.284472	0.440438	0.311081	0.241266	0.218767	0.399914	0.334848	0.253688	0.321254	0.568557		0.353782	0.218767	0.617937
cg08598221	SNTB1	8	121894110	0.71288	0.332112	0.387761	0.300084	0.229336	0.382878	0.321915	0.356679	0.344061	0.263234	0.382448	0.278752	0.278258	0.370521	0.316659	0.248	0.27645	0.272339	0.261943	0.437563	0.286996		0.3164	0.229336	0.437563
cg19118077	AKR1C3	10	5127178	0.752273	0.151967	0.179202	0.14617	0.10479	0.0786914	0.0660311	0.102101	0.0951961	0.083086	0.0699255	0.120565	0.105229	0.0755694	0.116527	0.102475	0.0821715	0.100679	0.0814568	0.0875889	0.0902604		0.101984	0.0660311	0.179202
cg05767404	C1orf150	1	245779214	0.743956	0.431929	0.376951	0.179459	0.132013	0.230684	0.181571	0.286131	0.213126	0.247715	0.214646	0.102573	0.164362	0.139068	0.117329	0.162548	0.184874	0.318278	0.252642	0.430785	0.104143		0.223541	0.102573	0.431929
cg01820374	LAG3	12	6752344	0.763739	0.409306	0.335685	0.372657	0.444617	0.526623	0.311478	0.457916	0.433371	0.229497	0.44325	0.427615	0.514475	0.418626	0.457043	0.357116	0.365782	0.52485	0.375782	0.496107	0.61825		0.426002	0.229497	0.61825
cg02829654	LYST	1	234113562	0.786757	0.480628	0.327021	0.312833	0.238424	0.499059	0.406485	0.542037	0.310121	0.330786	0.418468	0.42502	0.487024	0.424975	0.470012	0.361619	0.476415	0.443954	0.366177	0.534719	0.475454		0.416561	0.238424	0.542037
cg13302154	MGP	12	14930699	0.738502	0.408073	0.365726	0.272887	0.34954	0.284564	0.333116	0.315182	0.339196	0.390374	0.360646	0.433306	0.226601	0.350725	0.306818	0.263838	0.258293	0.328018	0.191312	0.32349	0.368109		0.323491	0.191312	0.433306
cg07408456	PGLYRP2	19	15451532	0.758429	0.521707	0.452882	0.43079		0.417468	0.428821	0.431169	0.556004	0.30771	0.596961	0.553424	0.451688	0.464321	0.418171	0.320075	0.376476	0.387649	0.376673	0.500735	0.542231		0.449208	0.30771	0.596961
cg22919728	CHST13	3	127725180	0.779789	0.452326	0.358907	0.391083	0.133261	0.349212	0.272727	0.386637	0.348678	0.246377	0.501817	0.538232	0.419	0.298474	0.451166	0.335676	0.298841	0.389496	0.131936	0.413901	0.343002		0.353037	0.131936	0.538232
cg21448423	ACOT11	1	54786544	0.759338	0.520211	0.431302	0.36438	0.333673	0.343929	0.50075	0.363312	0.361357	0.264316	0.396858	0.388576	0.554335	0.565632	0.451497	0.119361	0.446798	0.292012	0.490783	0.45007	0.387201		0.401318	0.119361	0.565632
cg19832721	KIAA1267	17	41605643	0.744182	0.5536	0.49104	0.331871	0.632669	0.611195	0.389845	0.378764	0.381714	0.390344	0.711406	0.584144	0.362442	0.517584	0.54146	0.403712	0.433029	0.434199	0.34135	0.423863	0.400313		0.465727	0.331871	0.711406
cg24821554	GUCY1B2	13	50537954	0.800834	0.260451	0.257504	0.29263	0.18649	0.337364	0.320892	0.396383	0.490585	0.201898	0.386351	0.397194	0.296216	0.413401	0.327485	0.281469	0.475578	0.440092	0.236187	0.454522	0.351752		0.340222	0.18649	0.490585
cg13406950	GBP1	1	89303252	0.8179	0.190242	0.176183	0.201327	0.146133	0.230829	0.236063	0.224726	0.210654	0.117429	0.169705	0.248081	0.384246	0.220986	0.191432	0.143029	0.308156	0.211084	0.238315	0.306623	0.35701		0.225613	0.117429	0.384246
cg09809672	EDARADD	1	234624305	0.855693	0.55433	0.533682	0.455711	0.332357	0.407157	0.413898	0.529354	0.553547	0.369891	0.515971	0.452259	0.595672	0.433083	0.595681	0.321163	0.47462	0.606776	0.410931	0.652153	0.453403		0.483082	0.321163	0.652153
cg16744741	PRKG2	4	82345049	0.921479	0.400572	0.430718	0.44608	0.277009	0.39667	0.347602	0.360444	0.454923	0.228719	0.394861	0.499717	0.424428	0.360542	0.476123	0.272883	0.323722	0.478809	0.400347	0.410224	0.419282		0.390184	0.228719	0.499717
The table includes methylation levels (β-values) for the patient and his parents as well as 18 unrelated normal controls for the 131 CpGs where the patient showed an aberrant methylation level compared to the normal controls in the pseudoproband approach.
Colour coding: green - unmethylated, black - hemimethylated and red - methylated.
The first column gives the identifiers of the CpG dinucleotides investigated on the Illumina Infinium HumanMethylation27 BeadChip (27k array).
The chromosomal position and mapinfo (hg18) are given for the CpG dinucleotides as well as the gene symbol.
The β-values given for the patient and his parents are averages based on two technical replicates each.
The average β-values, as well as the range (minimum and maximum) are shown for normal controls and parents.
Imprinted genes (based on www.geneimprint.com) are highlighted in red.
Of note: Not all imprinted genes or their DMRs are investigated on the 27k array (59 CpGs are associated with imprinted genes, but not all of these CpGs map to a DMR, and not all DMRs are exactly defined).
