# Supplementary material
Source: publisher figshare collection journal article supplement (https://plos.figshare.com/articles/dataset/_/818752)
Supplement: Supplementary file 1 [file 1 › Table_S2.xls]

## Sheet: Table S2.
Table S2. Identifiers for SNPs used for allele-separation.
Gene	rs number SNP
	Methylation	Expression
ACTN3	rs17496586
AKR1C3	rs1937843
CCDC19	rs2494486
CHP2 (LOC63928)	rs152041
ECEL1	rs2742073
EDARADD	rs966365
FAM50B	rs2239713	rs6597007
GAL3ST1	rs42932
HKR1	rs11671057
HOXB6	rs11079830
KCNAB3	rs9911390
KIF12	rs13288531
MAMDC2	rs11141404
NAV1	rs1267119
POU3F1	rs7555037
SEC31B (SEC31L2)	rs3750632
TRPC3	rs13121031	rs11732666
TSPO (BZRP)	rs138908
ZNF710	rs28549175
	rs113033620
The table shows the identifiers (rs numbers) for the SNPs used for allele-separation in the methylation analyses and for the expression studies.
