# Supplementary material
Source: publisher figshare collection journal article supplement (https://plos.figshare.com/articles/dataset/_/818752)
Supplement: Supplementary file 1 [file 1 › Table_S3.xls]

## Sheet: Genotyping
Table S3. Primer sequences.
Gene	Primer	Primer sequence 5' - 3'	Size PCR product	PCR conditions
ACTN3	ACTN3_F_DNA	AGGGCACTATGAGGCCATT	300 bp	62°C
	ACTN3_R_DNA	AAGGACAGGGATGACACCAC
AKR1C3	AKR1C3_F_DNA	AGGCAATCCTTGTTCTGCAT	241 bp	62°C
	AKR1C3_R_DNA	TCTGGATCGTATGTTCTTGGAA
CCDC19	-
CHP2	CHP2_F_DNA	CAGCCTCCACCACGTAAAAT	227 bp	60°C
	CHP2_R_DNA	GAGCTCCAGACTGGGAATGA
ECEL1	ECEL1_F_DNA	TCCATGGCTCTCACACATTG	195 bp	60°C
	ECEL1_R_DNA	AGACAGCCTGGCCCTAATG
EDARADD	EDARADD_F_DNA	ATTCCCCAGAGAGCTTTCATC	244 bp	62°C
	EDARADD_R_DNA	CCTCTGGCTAAAAACTCAGCTC
FAM50B	FAM50B_F_DNA	CTCCTGTTTTCACGCTGTGG	223 bp	62°C
	FAM50B_R_DNA	AGTGGTGCGCAGGTAATGTT
GAL3ST1	GAL3ST1_F_DNA	TTGTTGGGGTCCAAAGAGAG	398 bp	60°C
	GAL3ST1_R_DNA	CATGCACAAAGGGAAACTCA
HKR1	HKR1_F_DNA	AGGTCTTTCCCACACCTCTG	278 bp	60°C
	HKR1_R_DNA	CTCGGGACAGGGAGTGAAG
HOXB6	HOXB6_F_DNA	AGCAGAGCTCCTGTGGAGAG	275 bp	60°C
	HOXB6_R_DNA	ATCGCTGGATTCAACCACTC
KCNAB3	KCNAB3_F_DNA	CCCAATTCCGCTCAGAAAAT	207 bp	60°C
	KCNAB3_R_DNA	GGGAGAGAGATGCCACTTCA
KIF12	HKR1_F_DNA	AGGTCTTTCCCACACCTCTG	278 bp	60°C
	HKR1_R_DNA	CTCGGGACAGGGAGTGAAG
MAMDC2	-
NAV1	NAV1_F_DNA	GTCCAAGACGCTGTCCAAGT	488 bp	58°C
	NAV1_R_DNA	CATCACAGCCTGATCGTGAA
POU3F1	POU3F1_F_DNA	AAGTCCGGGCAAACTCTAGC	300 bp	60°C
	POU3F1_R_DNA	GGGGTTCCAGAAGGAGAAGA
SEC31B	SEC31B_F_DNA	TTGGATCCGGCTCTACTGTC	481 bp	60°C
	SEC31B_R_DNA	CAGCATCAAGAGCCCGTATT
TRPC3	TRPC3_F_CpG55_DNA	TAGGTCCATGGAGGGAAGC	788 bp	TD	SNP for methylation analysis
	TRPC3_R_CpG55_DNA	GCGCAAAGCTTACCTTGAAC		66 → 59°C
TRPC3	TRPC3_F_DNA	CCCTGGACTTTGAGTTACCC	185 bp	TD	SNP for expression analysis
	TRPC3_R_DNA	TGCTCGTTCAAAACTTTGGTT		61 → 54°C
TSPO	TSPO_F_DNA	GGGAGGGAAAACTTGGACA	370 bp	60°C
(BZRP)	TSPO_F_DNA	CTTCTTTGCAAGGGGTAGGG
ZNF710	ZNF710_F_DNA	TGTGACCAACTTTGCTTTGG	214 bp	62°C
	ZNF710_R_DNA	CCTCCAACCTCCAGAACACC
The table summarises primer sequences, product sizes and PCR conditions used for genotyping.
For CCDC19 and MAMDC2 genotyping was not performed on genomic DNA.
For TRPC3 genotyping was performed for two different SNPs, one for the subsequent methylation analysis and one for the expression analysis.
For PCR the Ampli Taq Gold was used with standard protocols if not given otherwise.
TD - touchdown protocol

## Sheet: Methylation analyses
Table S3. Primer sequences.
Gene	Primer	Primer sequence 5' - 3'	Size PCR product	PCR conditions	Re-PCR
ACTN3	ACTN3_F_Bis	CTTGCTTCCTGGCACGAG-GGGGAGATTTGGGTTTTTTTA	321 bp	TD	TD
	ACTN3_R_Bis	CAGGAAACAGCTATGAC-TACCCTACCCTCTCCTAAAATCATA		61 → 54°C	62 → 55°C
AKR1C3	AKR1C3_F_Bis	CTTGCTTCCTGGCACGAG-AAGAATAAATTTAGTAGAAGTGAAATT	513 bp	TD	TD
	AKR1C3_R_Bis	CAGGAAACAGCTATGAC-AATACAATAAAAACTCTAATCCAAA		59 → 52°C	62 → 55°C
CCDC19	CCDC19_F_Bis	CTTGCTTCCTGGCACGAG-GGAAAATTGTGATTTTGGGTTAG	455 bp	TD	2-step*
	CCDC19_R_Bis	CAGGAAACAGCTATGAC-ACACAAAAAACCCATCTAAAATTCT		61 → 54°C	38 cycles
CHP2	CHP2_Bis_F	CTTGCTTCCTGGCACGAG-TTTTTAAAGTGTTGGGATTATAGGTATG	358 bp	TD	TD
	CHP2_Bis_R	CAGGAAACAGCTATGAC-AACAACAAAAACTCTTATTTACCAC		61→ 54°C	62 → 55°C
ECEL1	ECEL1_Bis_F	CTTGCTTCCTGGCACGAG-GTAGGGGTTTTAAGGAGGATAA	377 bp	TD	TD
	ECEL1_Bis_R	CAGGAAACAGCTATGAC-AACCACCTAACAATAAAAC		54 → 47°C	62 → 55°C
EDARADD	EDARADD_F_Bis	CTTGCTTCCTGGCACGAG-TTTGAGGTTGGGTTGTTAATAAGTT	459 bp	TD	TD
	EDARADD_R_Bis	CAGGAAACAGCTATGAC-CTCTAAAAAATCCAAAAAAACAACAA		61 → 54°C	62 → 55°C
FAM50B+	FAM50B_F_Bis_nested_M#	CTTGCTTCCTGGCACGAG-GAAATAGGAAGTGGAGGTGGAT	358 bp	TD	TD
	FAM50B_R_rev_Bis	CAGGAAACAGCTATGAC-AAAAAAAATTAAAAAACAAAACC		57 → 50°C	62 → 55°C
GAL3ST1	GAL3ST1_F_Bis	CTTGCTTCCTGGCACGAG-AGTTTGTTTTGGGTTTTTTGTAGG	427 bp	TD	TD
	GAL3ST1_R_Bis	CAGGAAACAGCTATGAC-AAACAAAAAAAACACACTCACCTC		61 → 54°C	62 → 55°C
HKR1	HKR1_F_Bis	CTTGCTTCCTGGCACGAG-TTTTTTAAGGTTTTTTTTATATTTTTGT	383 bp	TD	TD
	HKR1_R_Bis	CAGGAAACAGCTATGAC-ACAACCAATTCCCATCCAATA		61 → 54°C	59 → 52°C
HOXB6	HOXB6_F_Bis	CTTGCTTCCTGGCACGAG-AAAAATATTAAGAGGTTGGAGTTTTGA	419 bp	TD	TD
	HOXB6_R_Bis	CAGGAAACAGCTATGAC-AAAACCCCCTTCCCAACTATAC		65 → 58°C	62 → 55°C
KCNAB3	KCNAB3_F_Bis	CTTGCTTCCTGGCACGAG-GGGTTTTAGAGGGTGTAGGAGTTAT	203 bp	TD	TD
	KCNAB3_R_Bis	CAGGAAACAGCTATGAC-AACCCAACTCATCAACATACAAAC		65 → 58°C	63 → 56°C
KIF12	KIF12_F_Bis	CTTGCTTCCTGGCACGAG-TAGTTTTGGGTAGTTGGAGTTTTTT	387 bp	TD	TD
	KIF12_R_Bis	CAGGAAACAGCTATGAC-TATACCCACCTAAACACCACCTAAA		65 → 58°C	63 → 56°C
MAMDC2	MAMDC2_F_Bis	CTTGCTTCCTGGCACGAG-AGTTTTTTTAGAAGTAATTTTTTTT	390 bp	TD	TD
	MAMDC2_R_Bis	CAGGAAACAGCTATGAC-CCTACATCTAACATATCAATCCC		57 → 50°C	57 → 50°C
NAV1	NAV1_F_Bis	CTTGCTTCCTGGCACGAG-TTGGTAGAGGGGATAGGTTTAGAGT	334 bp	TD	TD
	NAV1_R_Bis	CAGGAAACAGCTATGAC-TTAAACAAAATAAAATCCAAAAACC		62 → 55°C	63 → 56°C
POU3F1	POU3F1_F_Bis	CTTGCTTCCTGGCACGAG-GGGTATTGAGGTTTAGGTGAGTAT	457 bp	TD	TD
	POU3F1_R_Bis	CAGGAAACAGCTATGAC-TTTCAACAACTCCAAACAAATC		65 → 58°C	62 → 55°C
SEC31B	SEC31B_F_Bis	CTTGCTTCCTGGCACGAG-GTTTGGGGTTTTTGGTAGTAGAGA	369 bp	TD	TD
	SEC31B_R-Bis	CAGGAAACAGCTATGAC-AAAATCAACAATAACAAACCTTCC		63 → 56°C	62 → 55°C
TRPC3	TRPC3_F_Bis	CTTGCTTCCTGGCACGAG-GTTTATGGAGGGAAGTTTATTTTTG	334 bp	58°C	2-step
	TRPC3_R_Bis	CAGGAAACAGCTATGAC-AATTCTCCTTCTTAAACAACAACTC			35 cycles
TSPO	TSPO_F_Bis	CTTGCTTCCTGGCACGAG-AGGGAAAATTTGGATAATTTTGTTA	378 bp	TD	TD
(BZRP)	TSPO_R_Bis	CAGGAAACAGCTATGAC-CAAACAAATCCCAAAAACTACTC		61 → 54°C	62 → 55°C
ZNF710	ZNF710_F_Bis	CTTGCTTCCTGGCACGAG-TTATGAATAATTGATTTTTTTTGG	441 bp	TD	TD
	ZNF710_R_Bis	CAGGAAACAGCTATGAC-TTTAAACAACTATTAACAAAACCCT		65 → 58°C	62 → 55°C
The table summarises primer sequences, product sizes and PCR conditions used for methylation analyses.
For PCR the HotStarTaq (HST; Qiagen, Hilden, Germany) was used if not stated otherwise.
TD - touchdown protocol
* - AmpliTaq Gold (Applied Bisosystems, Foster City, CA, USA)
+ - The first two and the last CpG were excluded from analysis for quality enhancement.
# - see [25]

## Sheet: Expression analyses
Table S3. Primer sequences.
Gene	Primer	Primer sequence 5' - 3'	Size PCR product	PCR conditions
FAM50B	FAM50B_F_cDNA	AGTGTTGCCACCTGGATTTG	214 bp	TD
	FAM50B_R_cDNA	TGAGGCATGGGGGTTTAATA		66 → 59°C
TRPC3	TRPC3_F_cDNA	ATGCTGCTTTTACCACTGTAG	449 bp	TD
	TRPC3_R_cDNA	TGAGTTAGACTGAGTGAAGAG		61 → 54°C
The table summarises primer sequences, product sizes and PCR conditions used for expression analyses.
For PCR the Ampli Taq Gold was used with a touchdown protocol (TD).
